# Supplementary material for: Development of a preclinical humanized mouse model to evaluate acute toxicity of an influenza vaccine
Source: PubMed Central journal article supplement (PMC5995229; doi:10.18632/oncotarget.25399), 2018-05-25
Supplement: oncotarget-09-25751-s001.pdf [file oncotarget-09-25751-s001.pdf]

## Development of a preclinical humanized mouse model to evaluate acute toxicity of an influenza vaccine

### SUPPLEMENTARY MATERIALS

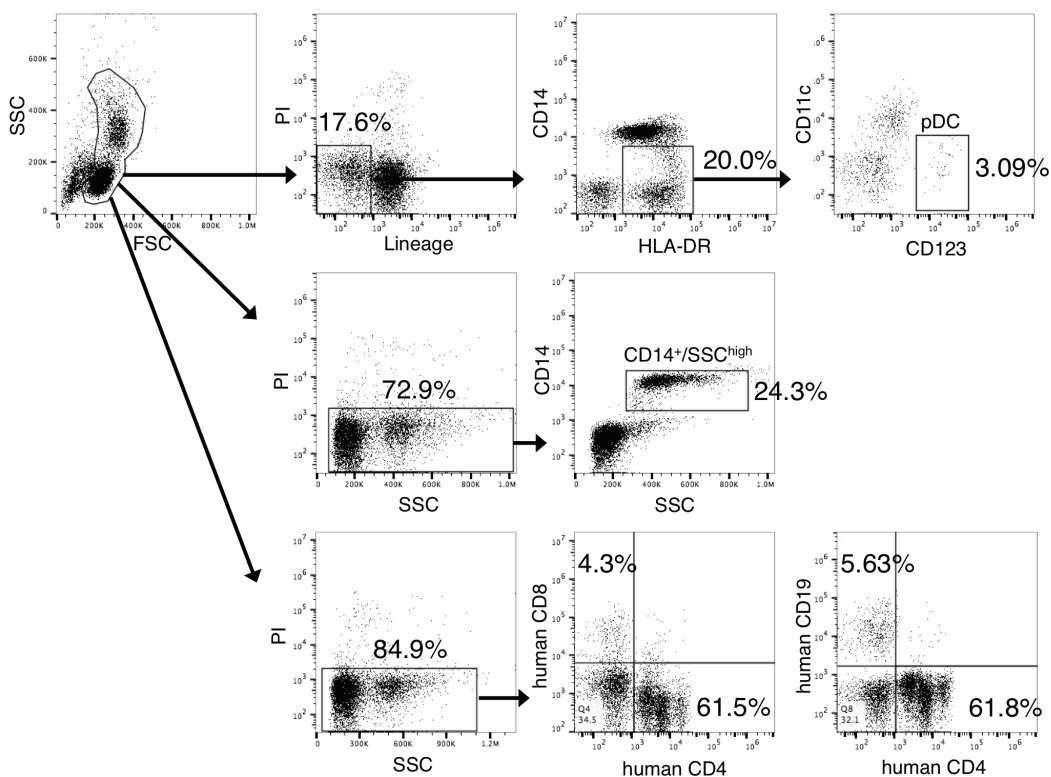

**Supplementary Figure 1: Representative gating strategies and characterizing lymphocyte, monocyte and dendritic cell frequencies in peripheral blood mononuclear cells (PBMC).** Representative dot plots of (top) plasmacytoid dendritic cells (Lineage<sup>-</sup>, HLA-DR<sup>+</sup>, human CD14<sup>-mid</sup>, human CD11c<sup>+</sup>, and human CD123<sup>+</sup>), (Middle) monocytes (human CD14<sup>+</sup>/SSC<sup>high</sup>) and (bottom) human CD4<sup>+</sup> T cells, human CD8<sup>+</sup> T cells, B cells (human CD19<sup>+</sup>) in PBMC.

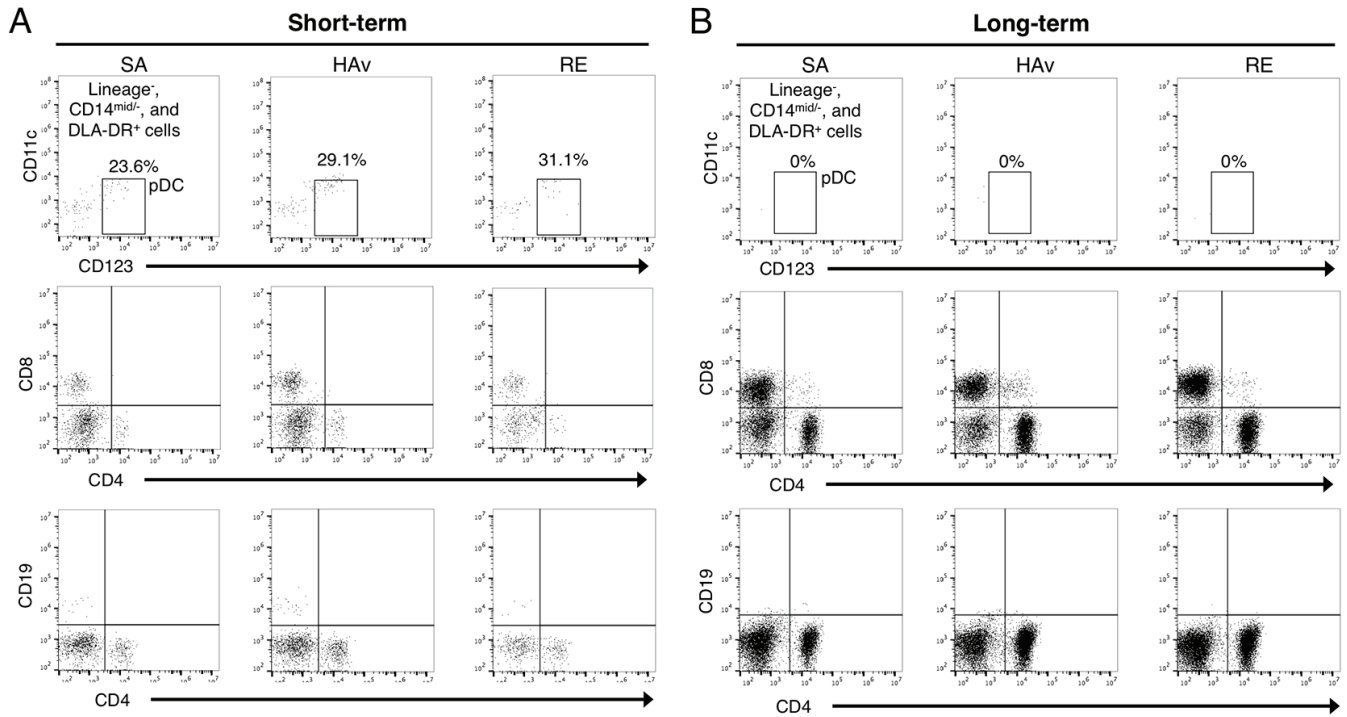

**Supplementary Figure 2: Retaining of human immune cells in lung of humanized mouse models used for histopathological analyses.** Representative dot plots of (top) plasmacytoid dendritic cells (Lineage<sup>-</sup>, HLA-DR<sup>+</sup>, human CD14<sup>mid</sup>, human CD11c<sup>+</sup>, and human CD123<sup>+</sup>), (Middle) human CD4<sup>+</sup> T cells, human CD8<sup>+</sup> T cells, and (bottom) human CD4<sup>+</sup> T cells and B cells (human CD19<sup>+</sup>) in PBMC. The left panel indicates the result from the short-term model (A) and right panel indicates the result from the long-term model (B).

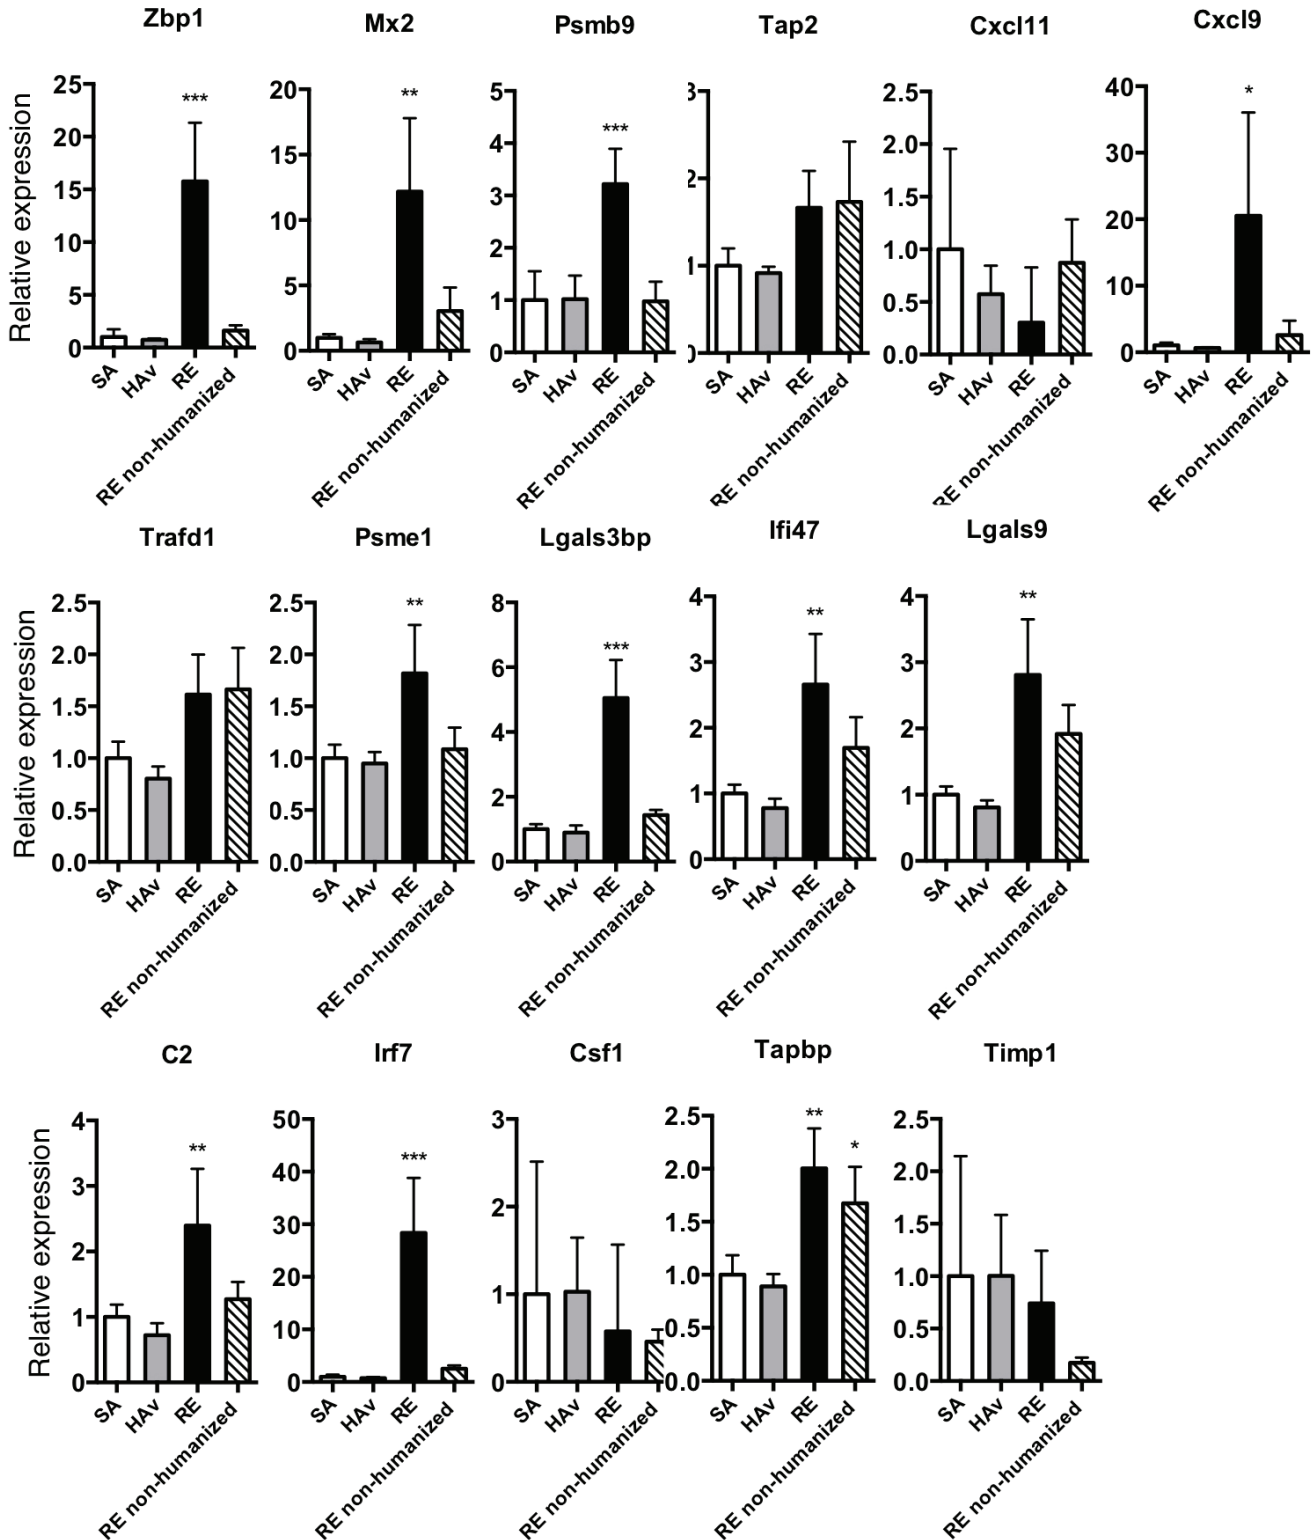

**Supplementary Figure 3: Mouse marker genes expression analyses in lung from vaccinated short-term humanized mouse models.** The short-term humanized mouse models were inoculated with toxicity references vaccine (RE), hemagglutinin split vaccine (HAV) or saline (SA), and 16hrs after the vaccination, lungs were collected and used for Quanti Gene Plex (QGP) assay, as described in the Methods. Data are the mean  $\pm$  SD ( $N = 3$ ). Data represent expression levels relative to beta-actin. The difference between SA-treated group were statistically significant at \* $P < 0.05$ , \*\* $P < 0.01$  and \*\*\* $P < 0.001$  by Dumnett's test.

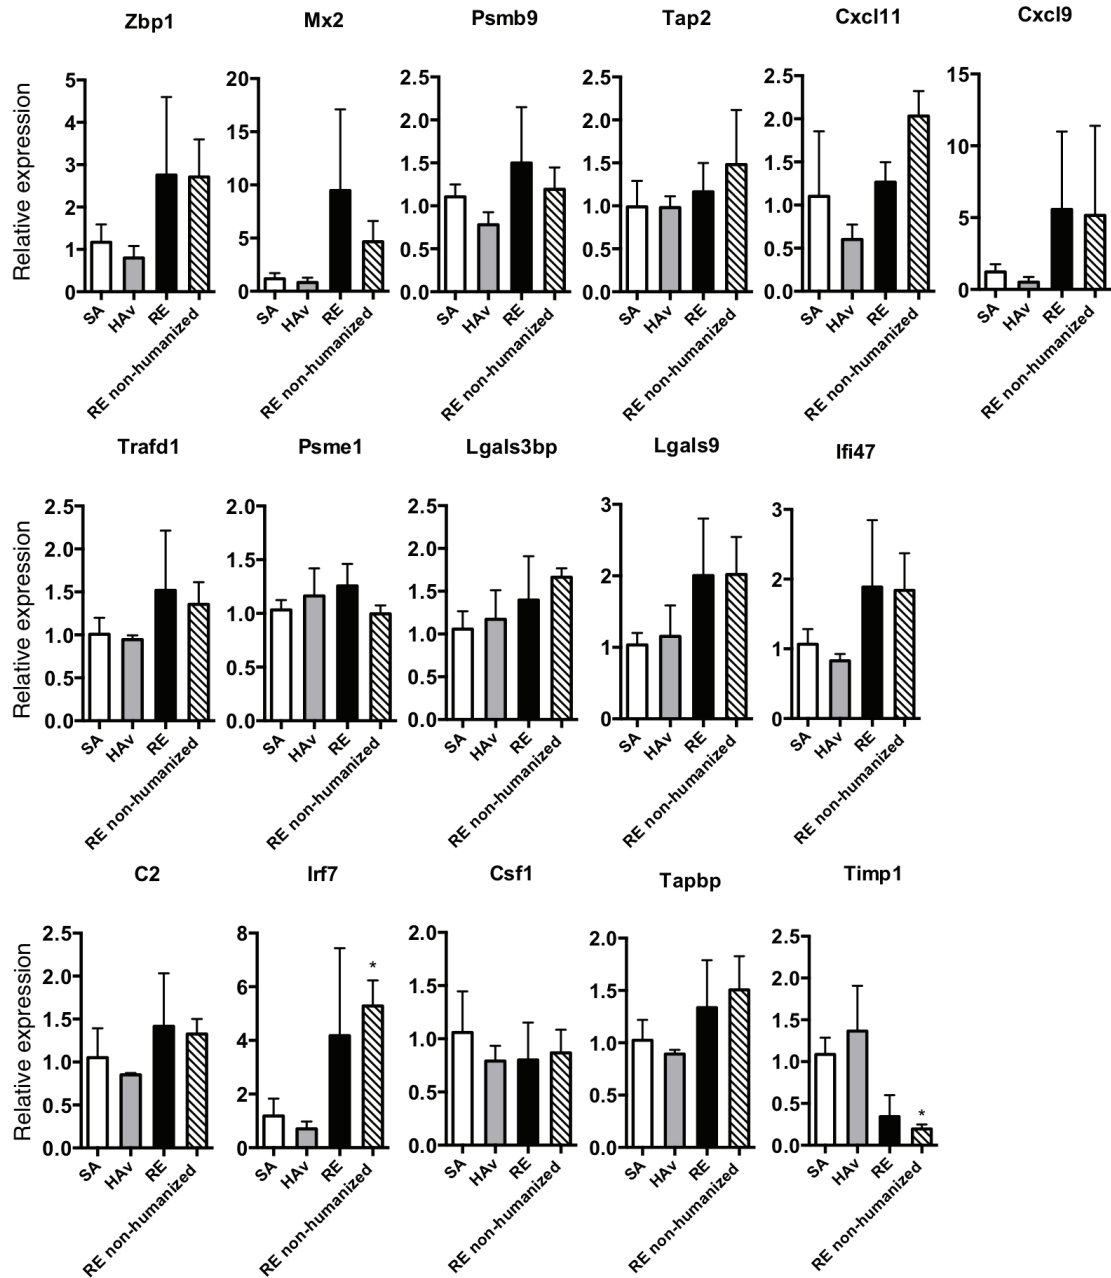

**Supplementary Figure 4: Mouse marker genes expression analyses in lung from vaccinated long-term humanized mouse models.** The long-term humanized mouse models were inoculated with toxicity references vaccine (RE), hemagglutinin split vaccine (HAV) or saline (SA), and 16 hrs after the vaccination, lungs were collected and used for Quanti Gene Plex (QGP) assay, as described in the Methods. Data are the mean  $\pm$  SD ( $N = 3$ ). Data represent expression levels relative to beta-actin. The difference between SA-treated group were statistically significant at  $*P < 0.01$  by Dunnett's test.

**Supplementary Table 1: The list of antibodies used for flow cytometry**

| <b>Antibody</b>    | <b>Source</b> | <b>Clone</b> | <b>Conjugate</b>           |
|--------------------|---------------|--------------|----------------------------|
| Human CD3          | eBioscience   | HIT3a        | phycoerythrin              |
| Human CD20         | eBioscience   | 2H7          | phycoerythrin              |
| Human CD56         | eBioscience   | CMSSB        | phycoerythrin              |
| Human HLA-DR       | eBioscience   | LN3          | fluorescein isothiocyanate |
| Human CD19         | eBioscience   | HIB19        | phycoerythrin              |
| Human CD8a         | eBioscience   | OKT8         | allophycocyanin            |
| Human CD14         | eBioscience   | 61D3         | allophycocyanin            |
| Human CD4          | eBioscience   | OKT4         | fluorescein isothiocyanate |
| Human CD14 for pDC | BioLegend     | 61D3         | pacific blue               |
| Human CD11c        | eBioscience   | 3.9          | allophycocyanin-eFluor780  |
| Human CD123        | BD Pharmingen | 7G3          | allophycocyanin            |

**Supplementary Table 2: Mouse marker genes for the safety evaluation of influenza vaccines**

| <b>Symbol</b>   | <b>Official full name</b>                                   | <b>Accession number</b> |
|-----------------|-------------------------------------------------------------|-------------------------|
| <i>Cxcl11</i>   | Chemokine (C-X-C motif) ligand 11                           | NM_019494               |
| <i>Cxcl9</i>    | Chemokine (C-X-C motif) ligand 9                            | NM_008599               |
| <i>Zbp1</i>     | Z-DNA binding protein 1                                     | NM_021394               |
| <i>Mx2</i>      | MX dynamin-like GTPase 2                                    | NM_013606               |
| <i>Irf7</i>     | Interferon regulatory factor 7                              | NM_016850               |
| <i>Lgals9</i>   | Lectin, galactoside-binding, soluble, 9                     | NM_010708               |
| <i>Ifi47</i>    | Interferon gamma inducible protein 47                       | NM_008330               |
| <i>Tapbp</i>    | TAP binding protein (tapasin)                               | NM_001025313            |
| <i>Csf1</i>     | Colony stimulating factor (macrophage)                      | NM_007778               |
| <i>Timp1</i>    | Tissue inhibitor of metalloproteinase 1                     | NM_001044384            |
| <i>Traf1</i>    | TRAF type zinc finger domain containing 1                   | NM_001163470            |
| <i>Lgals3bp</i> | Lectin, galactoside-binding, soluble, 3 binding protein     | NM_011150               |
| <i>Psmb9</i>    | Proteasome (prosome, macropain) subunit, beta type, 9       | NM_013585               |
| <i>C2</i>       | Complement component 2                                      | NM_013484               |
| <i>Tap2</i>     | Transporter 2, ATP-binding cassette, sub-family B (MDR/TAP) | XM_006525355            |
| <i>Ifrd1</i>    | Interferon-related developmental regulator 1                | NM_013562               |
| <i>Psmc1</i>    | Proteasome (prosome, macropain) activator subunit 1         | NM_011189               |
| <i>Ngfr</i>     | Nerve growth factor receptor                                | NM_033217               |
